# Supplementary material for: Influence of wood species on toxicity of log-wood stove combustion aerosols: a parallel animal and air-liquid interface cell exposure study on spruce and pine smoke
Source: PubMed Central journal article supplement (PMC7296712; doi:10.1186/s12989-020-00355-1), 2020-06-15
Supplement: 12989_2020_355_MOESM5_ESM.pdf [file 12989_2020_355_MOESM5_ESM.pdf]

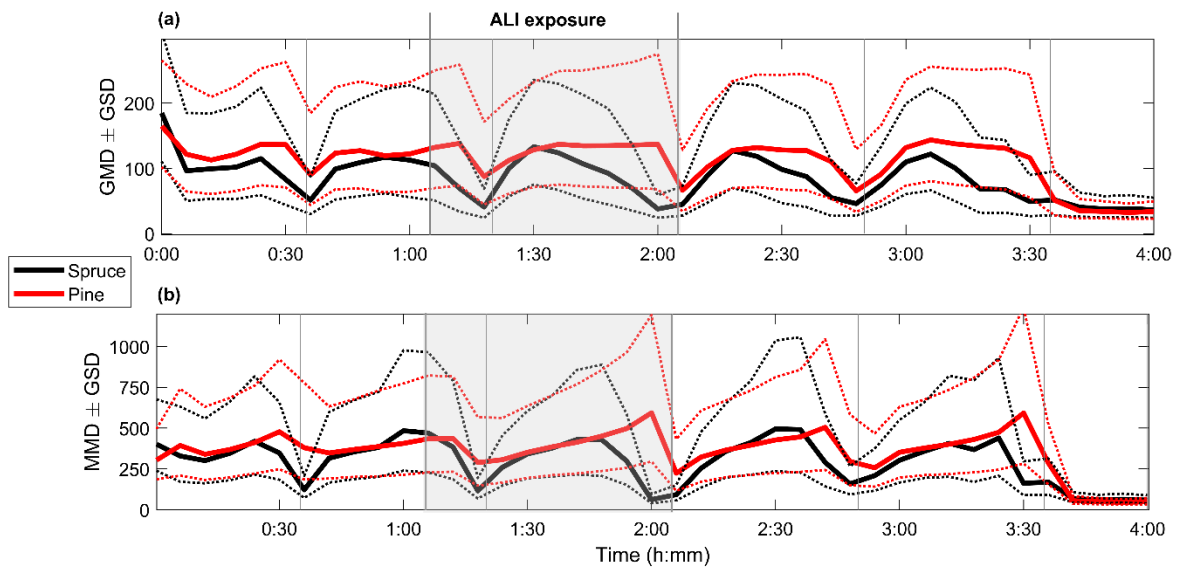

Supplementary Figure 3. Size of the particles measured by SMPS. The geometric mean diameters (a) and mass median diameters (b) are shown with the solid lines, while GSDs are represented with dashed lines. Average of 3 experiments.
