# Supplementary material for: Influence of wood species on toxicity of log-wood stove combustion aerosols: a parallel animal and air-liquid interface cell exposure study on spruce and pine smoke
Source: PubMed Central journal article supplement (PMC7296712; doi:10.1186/s12989-020-00355-1), 2020-06-15
Supplement: 12989_2020_355_MOESM6_ESM.pdf [file 12989_2020_355_MOESM6_ESM.pdf]

Supplementary Table 2. All measured organic compounds from wood combustion emissions. Organic compounds were sampled over 4-hour exposure. Concentrations are calculated as averages from three test cycles  $\pm$  standard deviation.

| Parameter                  | TEF   | spruce ( $\mu\text{g m}^{-3}$ ) | TEQ    | pine ( $\mu\text{g m}^{-3}$ ) | TEQ   |
|----------------------------|-------|---------------------------------|--------|-------------------------------|-------|
| <b>PAH</b>                 |       |                                 |        |                               |       |
| Phenanthrene               | 0.001 | 4.4 $\pm$ 2.5                   | 0.0044 | 23 $\pm$ 5                    | 0.023 |
| Anthracene                 |       | 1.2 $\pm$ 0.69                  |        | 6.2 $\pm$ 2.1                 |       |
| Fluoranthene               |       | 12 $\pm$ 3.5                    |        | 40 $\pm$ 5.4                  |       |
| Acephenanthrylene          |       | 5.3 $\pm$ 2                     |        | 16 $\pm$ 4.8                  |       |
| Pyrene                     | 0.001 | 11 $\pm$ 2.9                    | 0.011  | 40 $\pm$ 8.8                  | 0.04  |
| Benzo[c]phenanthrene       |       | 0.85 $\pm$ 0.35                 |        | 2.9 $\pm$ 1.1                 |       |
| Benzo[ghi]fluoranthene     |       | 4.5 $\pm$ 1.3                   |        | 16 $\pm$ 3.4                  |       |
| Benz[a]anthracene          | 0.1   | 2.9 $\pm$ 1                     | 0.29   | 8.4 $\pm$ 2.4                 | 0.84  |
| Cyclopenta[cd]pyrene       | 0.1   | 4.5 $\pm$ 3.1                   | 0.45   | 21 $\pm$ 12                   | 2.1   |
| Chrysene                   | 0.01  | 4.5 $\pm$ 1.8                   | 0.045  | 15 $\pm$ 5.5                  | 0.15  |
| sum_Benzo[b,k]fluoranthene | 0.1   | 7.2 $\pm$ 2.6                   | 0.72   | 25 $\pm$ 7.1                  | 2.5   |
| 2,2'-Binaphthalene         |       | 0.36 $\pm$ 0.13                 |        | 0.9 $\pm$ 0.42                |       |
| Benzo[e]pyrene             |       | 5.1 $\pm$ 1.7                   |        | 16 $\pm$ 6.8                  |       |
| Benzo[a]pyrene             | 1     | 2.1 $\pm$ 0.79                  | 2.1    | 6.6 $\pm$ 3.4                 | 6.6   |
| Perylene                   |       | 0.54 $\pm$ 0.18                 |        | 2.1 $\pm$ 1.4                 |       |
| Anthanthrene               | 0.1   | 0.14 $\pm$ 0.046                | 0.014  | 0.48 $\pm$ 0.23               | 0.048 |
| Dibenz[ah]anthracene       | 1     | 0.13 $\pm$ 0.039                | 0.13   | 0.42 $\pm$ 0.043              | 0.42  |
| Indeno[1,2,3-cd]pyrene     | 0.1   | 1.1 $\pm$ 0.39                  | 0.11   | 3.4 $\pm$ 1.4                 | 0.34  |
| Picene                     |       | 0.24 $\pm$ 0.11                 |        | 0.67 $\pm$ 0.5                |       |
| Benzo[ghi]perylene         |       | 2.2 $\pm$ 0.75                  |        | 7.7 $\pm$ 3.3                 |       |
| Coronene                   |       | 1.1 $\pm$ 0.49                  |        | 3.6 $\pm$ 2                   |       |
| Naphtho[1,2-b]fluoranthene |       | 1.4 $\pm$ 0.65                  |        | 4.2 $\pm$ 2.3                 |       |

|                            |    |               |      |             |      |
|----------------------------|----|---------------|------|-------------|------|
| Dibenzo[al]pyrene          | 10 | 1 ± 0.48      | 10   | 2.7 ± 1.4   | 27   |
| Naphtho[2,3-b]fluoranthene |    | 1 ± 0.54      |      | 3.3 ± 2.2   |      |
| Dibenzo[ae]pyrene          | 1  | 0.33 ± 0.21   | 0.33 | 0.76 ± 0.67 | 0.76 |
| Naphtho[2,1-a]pyrene       |    | 0.56 ± 0.22   |      | 1.1 ± 0.7   |      |
| Naphtho[2,3-a]pyrene       |    | 0.4 ± 0.25    |      | 1.9 ± 0.94  |      |
| Dibenzo[ai]pyrene          | 10 | 0.13 ± 0.06   | 1.3  | 0.36 ± 0.37 | 3.6  |
| Dibenzo[ah]pyrene          | 10 | 0.091 ± 0.051 | 0.91 | 0.2 ± 0.21  | 2    |

***Alkylated PAH***

|                                 |  |               |  |               |  |
|---------------------------------|--|---------------|--|---------------|--|
| 9-Methylphenanthrene            |  | 0.29 ± 0.42   |  | 0.41 ± 0.58   |  |
| 3,6-Dimethylphenanthrene        |  | 0.005 ± 0.008 |  | 0.006 ± 0.009 |  |
| Retene                          |  | 0.26 ± 0.21   |  | 0.61 ± 0.03   |  |
| 7,12-Dimethyl-Benz[a]anthracene |  | 0,14 ± 0.075  |  | 0.21 ± 0.3    |  |
| 1-Methyl-benz[a]anthracene      |  | 0.018 ± 0.011 |  | 0.033 ± 0.047 |  |

***o-PAH***

|                               |  |               |  |              |  |
|-------------------------------|--|---------------|--|--------------|--|
| 9H-Fluoren-9-one              |  | 12 ± 6.6      |  | 38 ± 27      |  |
| 1H-Phenalen-1-one             |  | 85 ± 22       |  | 180 ± 130    |  |
| Cyclopenta(def)phenanthrenone |  | 5.6 ± 2.5     |  | 22 ± 7.5     |  |
| 11H-Benzo[a]fluoren-11-one    |  | 1.5 ± 0.61    |  | 5.3 ± 1.2    |  |
| 11H-Benzo[c]fluoren-11-one    |  | 0.61 ± 0.29   |  | 2 ± 0.66     |  |
| 11H-Benzo[b]fluoren-11-one    |  | 2.2 ± 0.99    |  | 6.5 ± 1.9    |  |
| Xanthone                      |  | 1.2 ± 0.37    |  | 5.2 ± 0.83   |  |
| 1,8-Dihydroxynaphthalene      |  | 0.44 ± 0.12   |  | 2.6 ± 0.67   |  |
| 1,5-Dihydroxynaphthalene      |  | 0.036 ± 0.027 |  | 0.05 ± 0.071 |  |
| 1,8-Naphthalic anhydride      |  | 13 ± 3.1      |  | 52 ± 11      |  |
| 9,10-Anthracenedione          |  | 3.2 ± 0.97    |  | 13 ± 2.4     |  |
| Benz[a]anthracene-7,12-dione  |  | 0.19 ± 0.059  |  | 0.7 ± 0.14   |  |

|                       |                 |                 |
|-----------------------|-----------------|-----------------|
| 5,12-Naphthacenedione | $0.35 \pm 0.22$ | $0.92 \pm 0.45$ |
|-----------------------|-----------------|-----------------|

***Anhydro-sugars***

|            |                  |                 |
|------------|------------------|-----------------|
| Galactosan | $0.095 \pm 0.04$ | $0.35 \pm 0.15$ |
|------------|------------------|-----------------|

|          |                  |                 |
|----------|------------------|-----------------|
| Mannosan | $0.28 \pm 0.053$ | $0.62 \pm 0.13$ |
|----------|------------------|-----------------|

|              |               |               |
|--------------|---------------|---------------|
| Levoglucozan | $3.5 \pm 1.9$ | $4.9 \pm 3.6$ |
|--------------|---------------|---------------|

***Resin acids***

|                 |                   |                   |
|-----------------|-------------------|-------------------|
| Isopimaric acid | $0.005 \pm 0.006$ | $0.003 \pm 0.002$ |
|-----------------|-------------------|-------------------|

|                                   |                   |                   |
|-----------------------------------|-------------------|-------------------|
| Dehydroabietic acid, methyl ester | $0,029 \pm 0.029$ | $0.049 \pm 0.007$ |
|-----------------------------------|-------------------|-------------------|

|                     |             |                |
|---------------------|-------------|----------------|
| Dehydroabietic acid | $1.1 \pm 1$ | $1.4 \pm 0.25$ |
|---------------------|-------------|----------------|

|              |                   |                   |
|--------------|-------------------|-------------------|
| Abietic acid | $0.012 \pm 0.004$ | $0.024 \pm 0.006$ |
|--------------|-------------------|-------------------|

---
