# Supplementary material for: Influence of wood species on toxicity of log-wood stove combustion aerosols: a parallel animal and air-liquid interface cell exposure study on spruce and pine smoke
Source: PubMed Central journal article supplement (PMC7296712; doi:10.1186/s12989-020-00355-1), 2020-06-15
Supplement: 12989_2020_355_MOESM7_ESM.pdf [file 12989_2020_355_MOESM7_ESM.pdf]

Supplementary Table 3. Inorganic elements from spruce and pine combustion emissions. Organic compounds were sampled over 4-hour exposure. Concentrations are calculated as averages from three test cycles  $\pm$  standard deviation.

| element | unit                 | Spruce |      | Pine  |       |
|---------|----------------------|--------|------|-------|-------|
|         |                      | Avg.   | Sd   | Avg.  | Sd    |
| Al      | $\mu\text{g m}^{-3}$ | 1.37   | 0.18 | 1.02  | 0.83  |
| As      | $\text{ng m}^{-3}$   | 6.9    | 1.5  | 5.67  | 1.11  |
| B       | $\text{ng m}^{-3}$   | 80.7   | 47.6 | 136   | 87    |
| Ba      | $\text{ng m}^{-3}$   | 37.3   | 13.7 | 14.6  | 10.4  |
| Be      | $\text{ng m}^{-3}$   | 22.9   | 6.5  | 18.6  | 10.9  |
| Ca      | $\mu\text{g m}^{-3}$ | 3.47   | 0.41 | 3.95  | 0.52  |
| Cd      | $\text{ng m}^{-3}$   | 137    | 33   | 167   | 5     |
| Co      | $\text{ng m}^{-3}$   | 0.8    | 0.2  | 1.07  | 0.59  |
| Cr      | $\text{ng m}^{-3}$   | 57.3   | 16.5 | 45    | 22    |
| Cu      | $\text{ng m}^{-3}$   | 903    | 920  | 398   | 322   |
| Fe      | $\mu\text{g m}^{-3}$ | 1.51   | 0.91 | 0.667 | 0.377 |
| Hg      | $\text{pg m}^{-3}$   | 263    | 69   | 815   | 571   |
| K       | $\mu\text{g m}^{-3}$ | 124    | 27   | 75.1  | 31    |
| Li      | $\text{ng m}^{-3}$   | 5.53   | 1.51 | 3.22  | 0.34  |
| Mg      | $\mu\text{g m}^{-3}$ | 0.62   | 0.13 | 1.03  | 0.1   |
| Mn      | $\text{ng m}^{-3}$   | 153    | 15   | 113   | 22    |
| Mo      | $\text{ng m}^{-3}$   | 2.57   | 0.21 | 9.03  | 9.18  |
| Na      | $\mu\text{g m}^{-3}$ | 1.6    | 0.5  | 0.866 | 0.13  |
| Ni      | $\text{ng m}^{-3}$   | 27.3   | 8.1  | 24.2  | 13.4  |
| Pb      | $\text{ng m}^{-3}$   | 121    | 19   | 65.8  | 14.9  |
| S       | $\mu\text{g m}^{-3}$ | 17     | 4    | 8.56  | 2.75  |
| Sb      | $\text{ng m}^{-3}$   | 473    | 98   | 769   | 374   |

|    |                    |       |      |       |       |
|----|--------------------|-------|------|-------|-------|
| Se | ng m <sup>-3</sup> | 1.29  | 0.24 | 2.03  | 0.46  |
| Sn | ng m <sup>-3</sup> | 65    | 21   | 14.4  | 3.8   |
| Sr | ng m <sup>-3</sup> | 15.9  | 2.1  | 8.61  | 0.29  |
| Ti | ng m <sup>-3</sup> | 29.7  | 6.9  | 37.9  | 20.9  |
| V  | ng m <sup>-3</sup> | 0.773 | 0.2  | 0.595 | 0.196 |
| W  | ng m <sup>-3</sup> | 186   | 12   | 88.4  | 16.5  |
| Zn | µg m <sup>-3</sup> | 11.9  | 1.7  | 6.87  | 0.88  |

---
