# Supplementary material for: Influence of wood species on toxicity of log-wood stove combustion aerosols: a parallel animal and air-liquid interface cell exposure study on spruce and pine smoke
Source: PubMed Central journal article supplement (PMC7296712; doi:10.1186/s12989-020-00355-1), 2020-06-15
Supplement: 12989_2020_355_MOESM8_ESM.pdf [file 12989_2020_355_MOESM8_ESM.pdf]

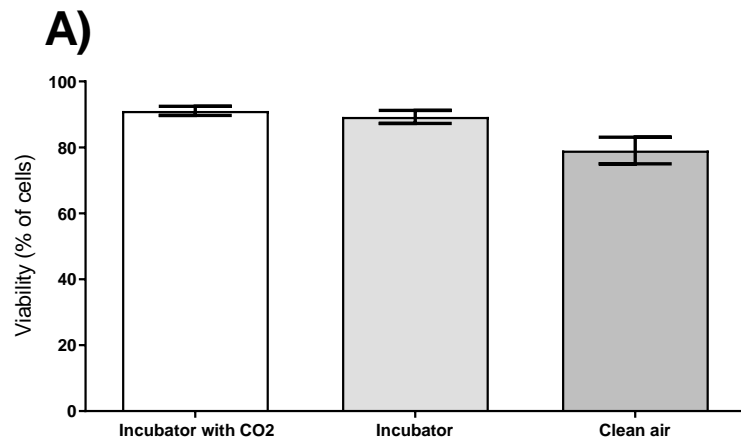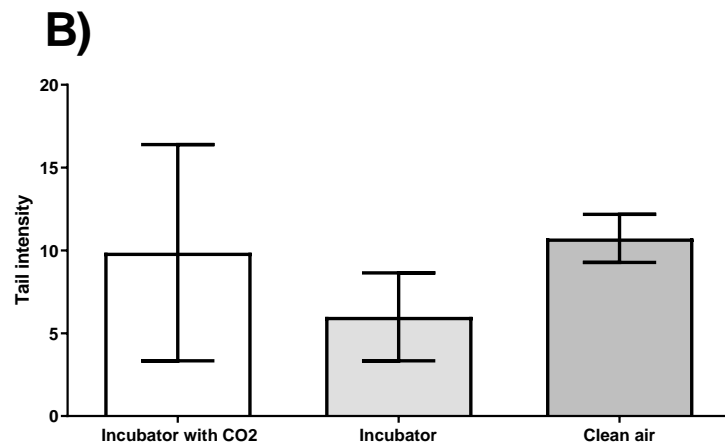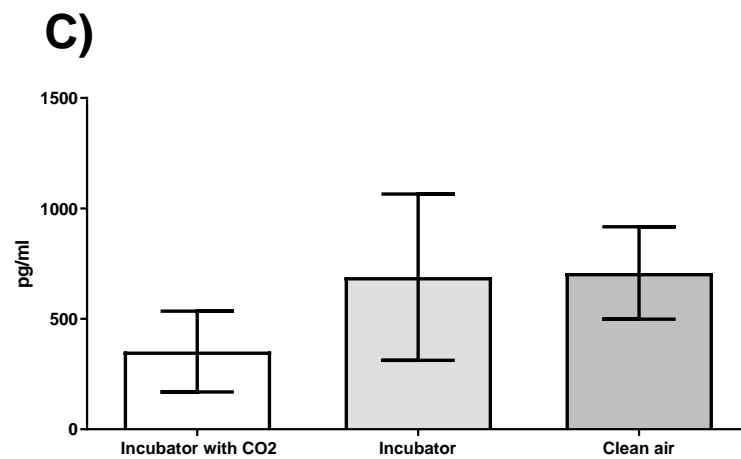

Supplementary Figure 4. Viability (A), Comet assay (B) and IL-8 secretion (C) of A549 control cells after exposed one hour at incubator with CO<sub>2</sub>, incubator without CO<sub>2</sub> or Tox-ALI to clean air. Each bar shows mean  $\pm$  SEM, n=3.
