# Supplementary material for: Influence of wood species on toxicity of log-wood stove combustion aerosols: a parallel animal and air-liquid interface cell exposure study on spruce and pine smoke
Source: PubMed Central journal article supplement (PMC7296712; doi:10.1186/s12989-020-00355-1), 2020-06-15
Supplement: 12989_2020_355_MOESM9_ESM.pdf [file 12989_2020_355_MOESM9_ESM.pdf]

Supplementary Table 4. Top 5 significant ingenuity canonical pathways of spruce aerosol exposure.

| A549 Spruce AS                                                                                        | -log(p-value) | Ratio    | z-score |
|-------------------------------------------------------------------------------------------------------|---------------|----------|---------|
| Role of Oct4 in Mammalian Embryonic Stem Cell Pluripotency                                            | 3.08          | 2.44E-01 |         |
| Role of PKR in Interferon Induction and Antiviral Response                                            | 2.84          | 2.44E-01 |         |
| Death Receptor Signaling                                                                              | 2.49          | 1.74E-01 | -2.000  |
| Hepatic Fibrosis / Hepatic Stellate Cell Activation                                                   | 2.08          | 1.37E-01 |         |
| Bladder Cancer Signaling                                                                              | 2.06          | 1.61E-01 |         |
| A549 Spruce HV                                                                                        |               |          |         |
| Role of PKR in Interferon Induction and Antiviral Response                                            | 3.22          | 2.68E-01 |         |
| Differential Regulation of Cytokine Production in Macrophages and T Helper Cells by IL-17A and IL-17F | 2.48          | 3.33E-01 |         |
| Role of Oct4 in Mammalian Embryonic Stem Cell Pluripotency                                            | 2.32          | 2.22E-01 |         |
| AMPK Signaling                                                                                        | 2.13          | 1.4E-01  |         |
| Cell Cycle Control of Chromosomal Replication                                                         | 2.07          | 1.96E-01 |         |
| Raw264.7 Spruce AS                                                                                    |               |          |         |
| IL-17A Signaling in Gastric Cells                                                                     | 3.2           | 2.73E-01 | 2.236   |
| Role of CHK Proteins in Cell Cycle Checkpoint Control                                                 | 2.77          | 1.64E-01 |         |
| GADD45 Signaling                                                                                      | 2.66          | 2.63E-01 |         |
| IL-17A Signaling in Fibroblasts                                                                       | 2.3           | 1.88E-01 |         |
| Role of BRCA1 in DNA Damage Response                                                                  | 2.14          | 1.25E-01 |         |
| Raw264.7 Spruce HV                                                                                    |               |          |         |
| Role of CHK Proteins in Cell Cycle Checkpoint Control                                                 | 5.16          | 2.36E-01 |         |
| TNFR2 Signaling                                                                                       | 4.64          | 0.3      |         |
| IL-7 Signaling Pathway                                                                                | 4.3           | 1.79E-01 |         |
| IL-17A Signaling in Gastric Cells                                                                     | 3.9           | 3.18E-01 | 2.236   |
| IL-17A Signaling in Fibroblasts                                                                       | 3.57          | 2.5E-01  |         |
| BALF Spruce AS                                                                                        |               |          |         |
| Epoxysqualene Biosynthesis                                                                            | 3.28          | 1        |         |
| Glutathione-mediated Detoxification                                                                   | 2.7           | 1.67E-01 | 2.000   |

|                          |      |          |
|--------------------------|------|----------|
| Nicotine Degradation III | 2.64 | 1.22E-01 |
| TREM1 Signaling          | 2.31 | 8.7E-02  |
| Nicotine Degradation II  | 2.26 | 0.1      |

---
