# Supplementary material for: Influence of wood species on toxicity of log-wood stove combustion aerosols: a parallel animal and air-liquid interface cell exposure study on spruce and pine smoke
Source: PubMed Central journal article supplement (PMC7296712; doi:10.1186/s12989-020-00355-1), 2020-06-15
Supplement: 12989_2020_355_MOESM10_ESM.pdf [file 12989_2020_355_MOESM10_ESM.pdf]

Supplementary Table 5. Top 5 significant ingenuity canonical pathways of pine aerosol exposed cells.

| A549 Pine AS                                                                                          | -log(p-value) | Ratio    | z-score |
|-------------------------------------------------------------------------------------------------------|---------------|----------|---------|
| Protein Ubiquitination Pathway                                                                        | 3.26          | 1.44E-01 |         |
| Aryl Hydrocarbon Receptor Signaling                                                                   | 3.13          | 1.69E-01 |         |
| p38 MAPK Signaling                                                                                    | 3.1           | 1.75E-01 | -2.400  |
| Aldosterone Signaling in Epithelial Cells                                                             | 2.9           | 1.56E-01 | -2.449  |
| Role of PKR in Interferon Induction and Antiviral Response                                            | 2.82          | 2.44E-01 |         |
| A549 Pine HV                                                                                          |               |          |         |
| Osteoarthritis Pathway                                                                                | 3.52          | 1.55E-01 |         |
| Aryl Hydrocarbon Receptor Signaling                                                                   | 3.21          | 1.69E-01 |         |
| Wnt/Ca+ pathway                                                                                       | 2.9           | 2.1E-01  |         |
| Aldosterone Signaling in Epithelial Cells                                                             | 2.66          | 1.5E-01  | -2.449  |
| Differential Regulation of Cytokine Production in Macrophages and T Helper Cells by IL-17A and IL-17F | 2.64          | 3.33E-01 |         |
| Raw264.7 Pine AS                                                                                      |               |          |         |
| NRF2-mediated Oxidative Stress Response                                                               | 3.57          | 1.18E-01 |         |
| MIF Regulation of Innate Immunity                                                                     | 3.06          | 0.2      |         |
| Pancreatic Adenocarcinoma Signaling                                                                   | 2.95          | 1.27E-01 |         |
| iNOS Signaling                                                                                        | 2.78          | 1.82E-01 |         |
| IL-10 Signaling                                                                                       | 2.71          | 1.52E-01 |         |
| Raw264.7 Pine HV                                                                                      |               |          |         |
| Role of Macrophages, Fibroblasts and Endothelial Cells in Rheumatoid Arthritis                        | 4.62          | 1.15E-01 |         |
| Small Cell Lung Cancer Signaling                                                                      | 4.32          | 1.76E-01 |         |
| TNFR2 Signaling                                                                                       | 3.83          | 2.67E-01 | 2.646   |
| IL-10 Signaling                                                                                       | 3.7           | 1.82E-01 |         |
| Acute Phase Response Signaling                                                                        | 3.65          | 1.28E-01 |         |
| BALF Pine AS                                                                                          |               |          |         |
| Agranulocyte Adhesion and Diapedesis                                                                  | 3.73          | 6.67E-02 |         |
| Crosstalk between Dendritic Cells and Natural Killer Cells                                            | 2.85          | 8.7E-02  |         |

|                                                        |      |          |
|--------------------------------------------------------|------|----------|
| Glucocorticoid Receptor Signaling                      | 2.76 | 4.42E-02 |
| Circadian Rhythm Signaling                             | 2.57 | 1.21E-01 |
| Communication between Innate and Adaptive Immune Cells | 2.25 | 7.81E-02 |
